# Supplementary material
Source: PubMed Central journal article supplement (PMC5826134)
Supplement: AAC.02227-17_zac003186966s1.pdf [file AAC.02227-17_zac003186966s1.pdf]

## Gene Expression (Old Vs Young)

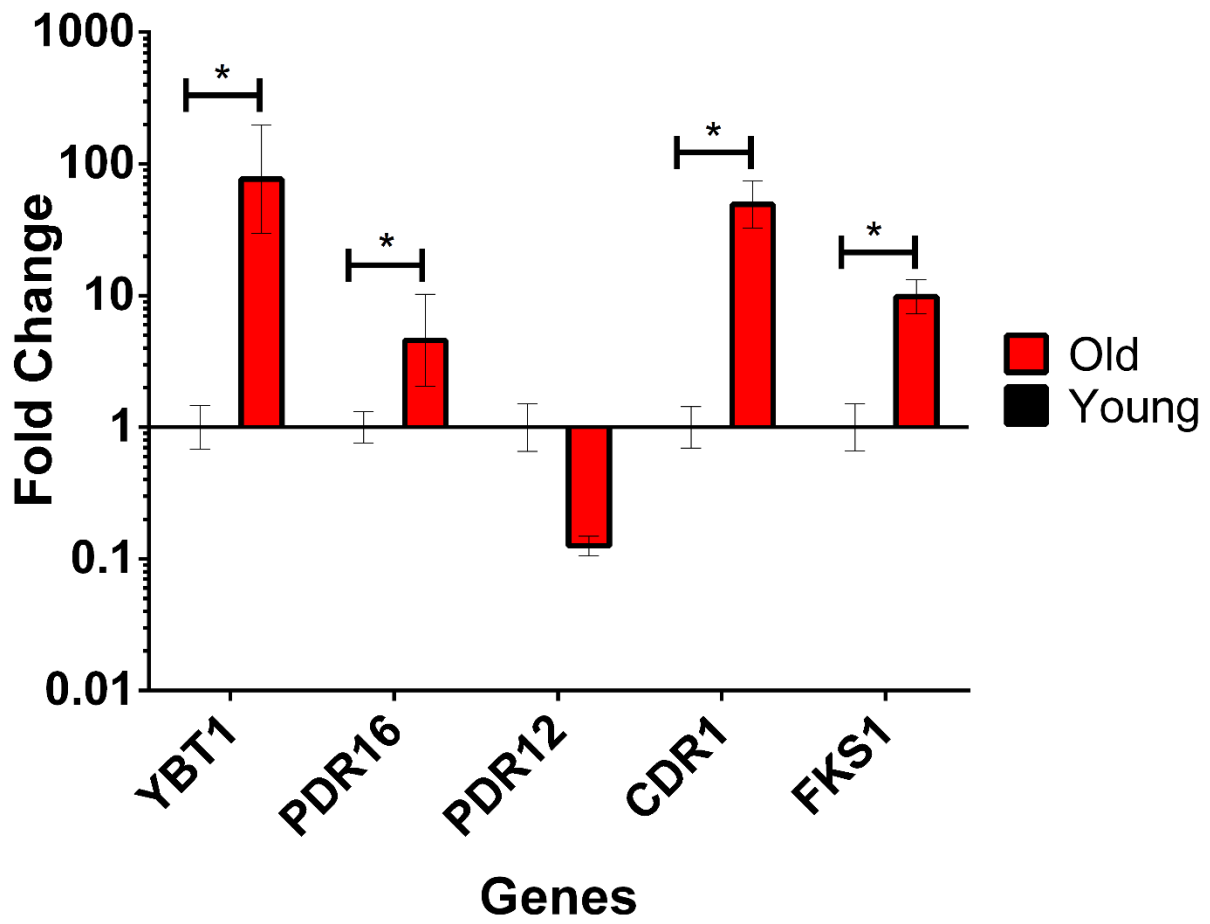

**Fig. S1 Expression of ABC-Ts In Old Vs Young *C. glabrata* cells.** The expression of four ABC-T encoding genes *YBT1*, *PDR16*, *PDR12*, and *CDR1*, and glucan synthase gene *FKS1* were analyzed using qRT-PCR. The gene expression was compared between the young and the old cells of *Cg#61*. *ACT1* gene was used as an internal control, and the data was normalized to the expression of each gene in the young cells. The assay was done in biological triplicates, and the error bars signify the standard deviation between the triplicates. Multiple t-test using the Holm-Sidak method was used to analyze the significance of the data (\*=  $p < 0.05$ ).

**Table. S1 Oligonucleotide Used For qRT-PCR**

|              |            |                                              |
|--------------|------------|----------------------------------------------|
| <i>ACT1</i>  | Fwd<br>Rev | TTGCCACACGCTATTTTGAG<br>ACCATCTGGCAATTCGTAGG |
| <i>YBT1</i>  | Fwd<br>Rev | CACCTGCATTTTTCCAGTT<br>TACCCCAACAAGGGTCTCAG  |
| <i>PDR16</i> | Fwd<br>Rev | CTGCTGAACAACAAGCGAAG<br>GGCATCCTTAACATGCCACT |
| <i>PDR12</i> | Fwd<br>Rev | AAATTTGCGGCCTCATACAC<br>CACCACCAACAGAGTGGTTG |
| <i>CDR1</i>  | Fwd<br>Rev | TGCAGGACCAAGTCAGACAG<br>CTCATCGGAAGTAGGGTCCA |
| <i>FKS1</i>  | Fwd<br>Rev | TATGGTCACCCGGATTTTCAT<br>TTTGTTACCCATACCAGCA |
